# Supplementary material
Source: PubMed Central journal article supplement (PMC4892940)
Supplement: NIHMS766701-supplement-4.pdf [file NIHMS766701-supplement-4.pdf]

Figure S4 Wang et al.

A

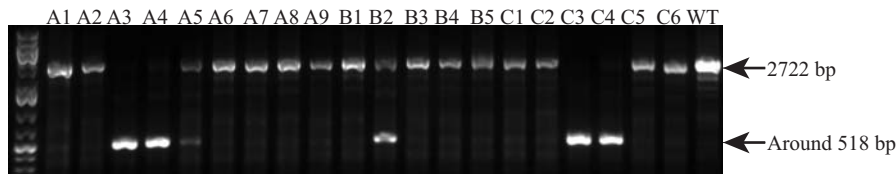

B

*Smc1b*

.....aatctaattgtaattggaatgcaactingttttgtaattggagagaaaa.....gagagaaa**cccgat**tttttgaagaaatcagttacttcaggagaattt.....

180 190 200 210 220 230  
AATCTAATGTAATGGATGCACCTTAGTTTTGTAATGGGAGAAAAGACAACCTAATTTAAG

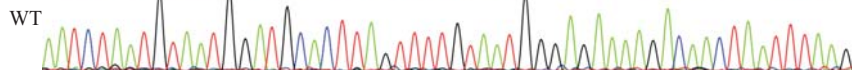

180 190 200 210 220  
AATCTAATGTAATGGATGCACCTTGAAGAAATCAGTACTTCAGGAGAAATTT

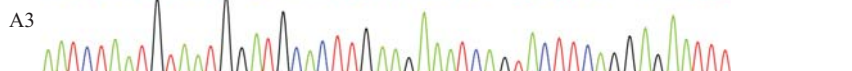

180 190 200 210 220  
AATCTAATGTAATGGATGCACCTTTTGAAGAAATCAGTACTTCAGGAGAAATTT

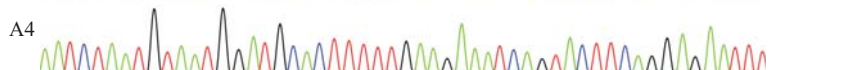

180 190 200 210 220  
AATCTAATGTAATGGATGCACCTTGAATAAATCAGGACTTTCAGGAGAAATTT

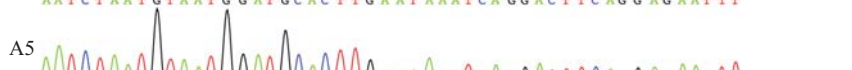

180 190 200 210 220  
AATCTAATGTAATGGATGCACCTTAGTTTTGAAAGAAATCAGTACTTTCAGGAGAAATTT

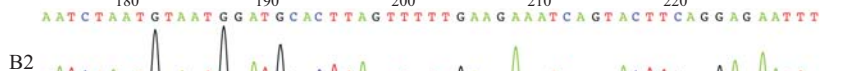

180 190 200 210 220  
AATCTAATGTAATGGATGCACCTTAGTTTTGAAAGAAATCAGTACTTTCAGGAGAAATTT

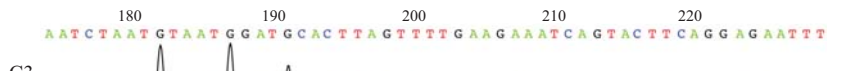

180 190 200 210 220  
AATCTAATGTAATGGATGCACCTTAGTTTTGAAAGAAATCAGTACTTTCAGGAGAAATTT

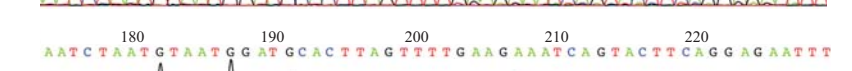

180 190 200 210 220  
AATCTAATGTAATGGATGCACCTTAGTTTTGAAAGAAATCAGTACTTTCAGGAGAAATTT
