# Supplementary material
Source: PubMed Central journal article supplement (PMC4892940)

Figure S1 Wang et al.

**A**

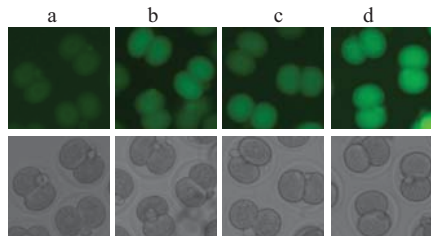

**B**

|   | Voltage | Pulse | Duration | Interval | No. of EP |
|---|---------|-------|----------|----------|-----------|
| a | 30 V    | 2     | 1 ms     | 100 ms   | 1         |
| b | 30 V    | 2     | 1 ms     | 100 ms   | 4         |
| c | 30 V    | 2     | 1 ms     | 100 ms   | 6         |
| d | 30 V    | 2     | 1 ms     | 100 ms   | 8         |

**C**

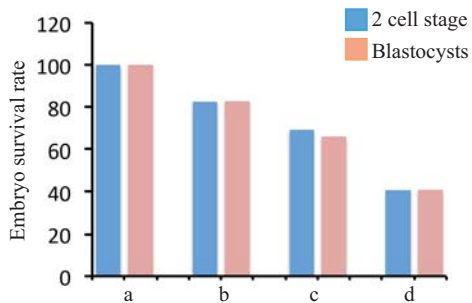

**D**

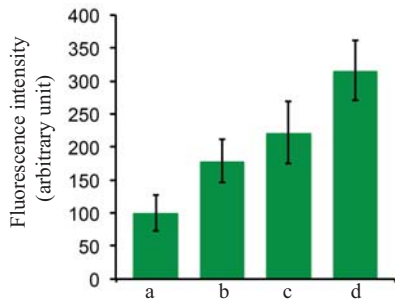

Supplement: NIHMS766701-supplement-1.pdf [file NIHMS766701-supplement-1.pdf]

Figure S2 Wang et al.

**A**

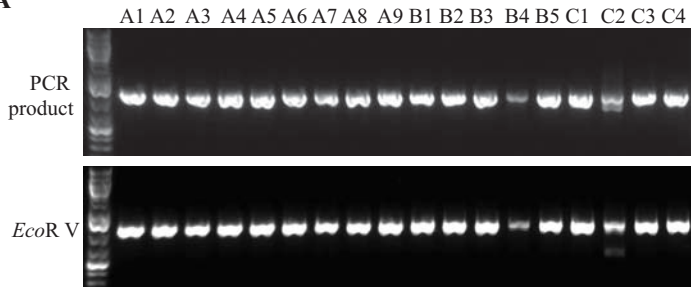

**B**

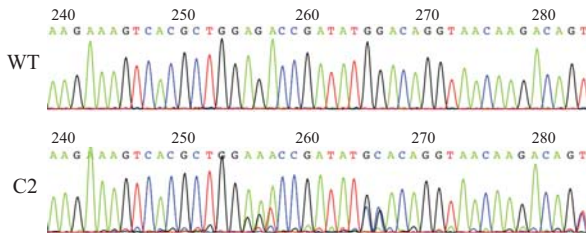

**C**

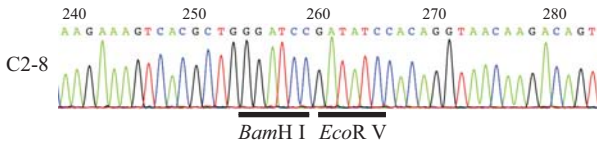

Supplement: NIHMS766701-supplement-2.pdf [file NIHMS766701-supplement-2.pdf]

Figure S3 Wang et al.

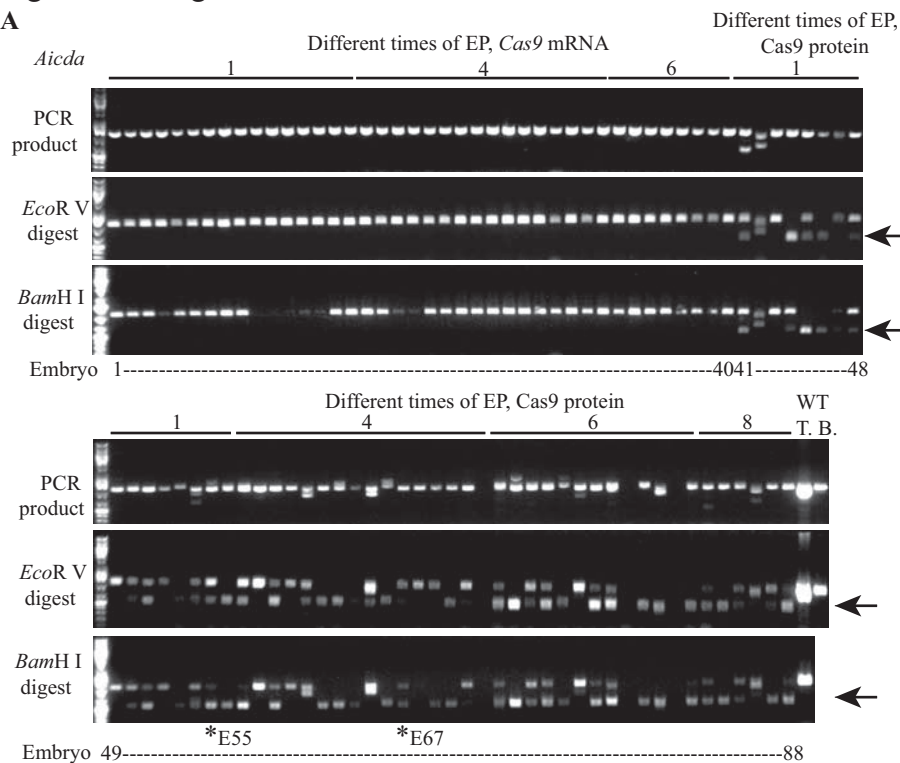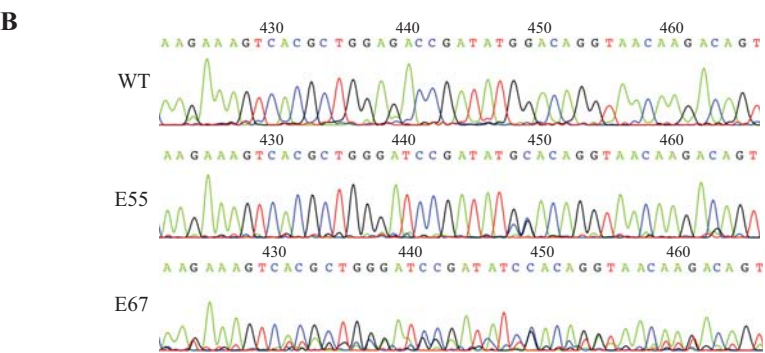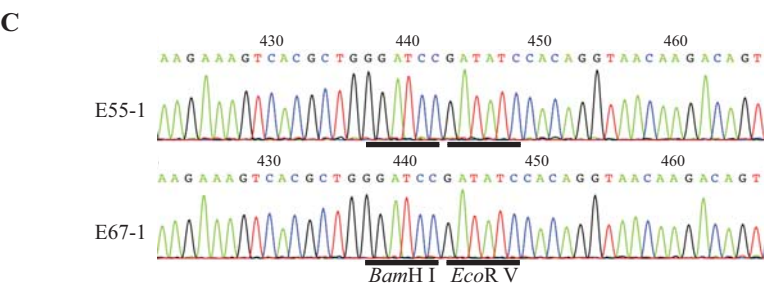

Supplement: NIHMS766701-supplement-3.pdf [file NIHMS766701-supplement-3.pdf]
